# Programmed cell death in the embryonic central nervous system of *Drosophila melanogaster*

Ana Rogulja-Ortmann, Karin Lüer, Janina Seibert, Christof Rickert and Gerhard M. Technau\*

Although programmed cell death (PCD) plays a crucial role throughout *Drosophila* CNS development, its pattern and incidence remain largely uninvestigated. We provide here a detailed analysis of the occurrence of PCD in the embryonic ventral nerve cord (VNC). We traced the spatio-temporal pattern of PCD and compared the appearance of, and total cell numbers in, thoracic and abdominal neuromeres of wild-type and PCD-deficient *H99* mutant embryos. Furthermore, we have examined the clonal origin and fate of superfluous cells in *H99* mutants by Dil labeling almost all neuroblasts, with special attention to segment-specific differences within the individually identified neuroblast lineages. Our data reveal that although PCD-deficient mutants appear morphologically well-structured, there is significant hyperplasia in the VNC. The majority of neuroblast lineages comprise superfluous cells, and a specific set of these lineages shows segment-specific characteristics. The superfluous cells can be specified as neurons with extended wild-type-like or abnormal axonal projections, but not as glia. The lineage data also provide indications towards the identities of neuroblasts that normally die in the late embryo and of those that become postembryonic and resume proliferation in the larva. Using cell-specific markers we were able to precisely identify some of the progeny cells, including the GW neuron, the U motoneurons and one of the RP motoneurons, all of which undergo segment-specific cell death. The data obtained in this analysis form the basis for further investigations into the mechanisms involved in the regulation of PCD and its role in segmental patterning in the embryonic CNS.

**KEY WORDS:** CNS, Programmed cell death, Segmental patterning, Neuroblasts, Lineages, *H99*, *Drosophila*

## INTRODUCTION

Programmed cell death (PCD) is a prominent feature of development in all metazoan organisms, functioning in the control of cell numbers, in the removal of redundant structures and in the elimination of misspecified or harmful cells (reviewed by Jacobson et al., 1997). Selective cell death also provides an elegant mechanism for spatial patterning of developing tissues and organs (reviewed by Rusconi et al., 2000), and is employed in refining the nervous system in both vertebrates and invertebrates (reviewed by Oppenheim, 1991; Truman et al., 1992), in digit formation in higher vertebrates, in removing larval tissues during insect morphogenesis and in a number of other developmental processes. In these processes, tight spatio-temporal regulation of PCD is required to ensure precise elimination of redundant cells. How this regulation is achieved, and how PCD is integrated with cell determination and differentiation during development, are fundamental questions in developmental biology that remain largely unanswered.

The fruitfly *Drosophila melanogaster* renders itself useful to investigations of PCD, as the genes required for the initiation and execution of PCD have been cloned and there are numerous genetic tools available to allow manipulation of genes and developmental processes. Our goal has been to investigate mechanisms involved in the regulation of PCD in the developing CNS of the *Drosophila* embryo, particularly with respect to its role in segmental patterning. We provide a basis for these investigations by pursuing a more detailed analysis of cell death in the embryonic CNS, and by establishing single-cell models for further examination of mechanisms regulating developmental cell death.

In *Drosophila*, significant amounts of apoptotic cells have been observed in the embryonic CNS from the early stages of CNS formation to the end of embryogenesis (Abrams et al., 1993). Several studies over the last decade have identified different kinds of apoptotic cells in the CNS (White et al., 1994; Sonnenfeld and Jacobs, 1995; Hidalgo et al., 2001; Peterson et al., 2002; Lundell et al., 2003; Miguel-Aliaga and Thor, 2004; Karcavich and Doe, 2005). In most cases, the developmental signals responsible for inducing PCD in these cells are unclear. Embryonic neuroblast (NB) PCD has been shown to require the proapoptotic gene *reaper* (*rpr*) (Peterson et al., 2002), but it is not known how *rpr* is activated to induce PCD in these NBs. In the third-instar larva, a pulse of the Hox protein Abdominal-A induces PCD in the dividing abdominal postembryonic NBs through activation of one or more of the three proapoptotic genes *Hid* (*Wrinkled* – Flybase), *rpr* and *grim*, and thus limits the production of neural cells in the abdominal CNS (Bello et al., 2003). Whether a similar signal is involved in the death of the embryonic NBs remains to be investigated. Other groups have reported PCD occurring in postmitotic differentiated neural cells. Sonnenfeld and Jacobs (Sonnenfeld and Jacobs, 1995) were the first to report degeneration of differentiated midline glial cells upon completing their function in the morphogenesis of commissural axon tracts in early embryogenesis. Hidalgo and colleagues (Hidalgo et al., 2001) showed that survival of longitudinal glia (LG) depends on the Neuregulin trophic factor homolog Vein. Miguel-Aliaga and Thor (Miguel-Aliaga and Thor, 2004) found that the pioneer neurons dMP2 and MP1 undergo segment-specific PCD at the end of embryogenesis, and that the Hox gene *Abdominal-B* is required for the survival of these cells in posterior segments of the ventral nerve cord (VNC). Several studies (Novotny et al., 2002; Lundell et al., 2003; Karcavich and Doe, 2005) have reported apoptosis among the progeny of the neuroblast NB7-3. One to two of the six postmitotic cells produced in this lineage undergo apoptosis and these are the first reported examples of the death of

Institute of Genetics, University of Mainz, Saarstrasse 21, D-55122 Mainz, Germany.

\* Author for correspondence (e-mail: technau@uni-mainz.de)

clearly identifiable, undifferentiated cells in the *Drosophila* embryonic CNS. Furthermore, Notch was identified as the apoptotic signal in the NB7-3 lineage (Lundell et al., 2003), but exactly how it activates the apoptotic pathway is unknown.

Despite the obvious importance of PCD in *Drosophila* development, only a very general overview of the occurrence of PCD in the developing embryonic CNS has been provided to date (Abrams et al., 1993). A systematic analysis of the number, segmental pattern and identity of dying cells has not been made. Such a detailed analysis would provide an important foundation for further research on mechanisms regulating developmental cell death. We present here the results of three approaches taken to gain insight into the occurrence and role of PCD in the embryonic CNS of *Drosophila melanogaster*: (1) tracing the spatio-temporal pattern of apoptotic cells in the developing wild-type CNS, as well as comparing the total cell numbers in thoracic and abdominal neuromeres of wild-type and PCD-deficient embryos; (2) examining the clonal origin, development and axonal projection patterns of additional cells in PCD-deficient embryos by Dil labeling of NB lineages; and (3) analysis of specific cell subpopulations in PCD-deficient embryos using various cell markers, and determination of the timing of PCD and the identity of some of these cells in the wild type, in order to establish models for studying mechanisms of PCD regulation.

## MATERIALS AND METHODS

### *Drosophila* stocks

*OregonR* was used as the wild-type strain. *Df(3L)H99/TM3*, *Sb* flies were obtained from the Bloomington *Drosophila* Stock Center and rebalanced over *TM6b*, *abdA-lacZ* and *TM6*, *ubi-GFP* balancer chromosomes.

### Immunohistochemistry

Following dechorionization in 7.5% bleach, embryos from overnight collections were devitelinized and fixed in heptane with 4% formaldehyde in PEMS buffer (0.1M Pipes, 1mM MgSO<sub>4</sub>, 1mM EGTA, 1.2 M Sorbitol, all Sigma) for 25 minutes. The fixed embryos were dehydrated by a 10 minute wash in methanol. For staining with diaminobenzidine (DAB, Sigma), embryos were incubated in 3% H<sub>2</sub>O<sub>2</sub> solution in ethanol for 15 minutes. Primary antibodies used were mouse BP102 (1:20), mouse anti-FasII (1:10), mouse anti-Engrailed/Invected (1:2) and mouse anti-Even-skipped (1:2), all from Developmental Studies Hybridoma Bank; mouse anti-BrdU (1:3.5, Becton-Dickinson), rabbit anti-human activated caspase-3 (1:50, Cell Signalling Technology), rat anti-Gooseberry distal (1:2, R. Holmgren, Northwestern University, Evanston, IL, USA), rat anti-Gooseberry proximal (1:2, R. Holmgren), guinea pig anti-Hb9 (1:1000, J. Skeath, Washington University School of Medicine, St. Louis, MO, USA), rabbit anti-Repo (1:500) (Halter et al., 1995), mouse anti-Ladybird early (1:2, K. Jagla, Institut National de la Santé et de la Recherche Médicale, Clermont-Ferrand, France), rabbit anti-Eagle (1:500) (Dittrich et al., 1997), mouse anti-Eagle (1:10, C. Doe, University of Oregon, Eugene, OR, USA), rabbit anti-Even-skipped (1:1000, M. Frasch, Mount Sinai School of Medicine, New York, NY, USA), rabbit anti-β-gal (1:2000, Cappel). The secondary antibodies used were anti-mouse-biotin, anti-rat-biotin, anti-guinea pig-biotin, anti-rabbit-biotin, anti-mouse-FITC, anti-rat-FITC, anti-rabbit-FITC, anti-guinea pig-Cy5, anti-rat-Cy5, anti-rabbit-Cy5, anti-mouse-Cy3, anti-guinea pig-Cy3, anti-rabbit-Cy3 (1:250, all from donkey, all Jackson Immunoresearch Laboratories), anti-mouse-Cy5 from goat (1:250, Jackson Immunoresearch Laboratories) and donkey anti-mouse-Alexa488 (1:250, Molecular Probes). For DAB stainings, the ABC Kit from Vectastain was used. Color images were produced using a Zeiss Axioplan 2 microscope. The Leica TCS SPII confocal microscope was used for fluorescent imaging, and the images were processed using Leica Confocal software and Adobe Photoshop.

### Cell counts

Embryos were fixed as described above, then incubated for 40 minutes in a 2 μg/ml RNase solution. Following washes in PBT and PBS, embryos were embedded in 70% glycerol. Fillet preparations were made and stacks

recorded with Nomarski optics. Sections were taken every 0.98 μm, using a Zeiss Axioskop 2 microscope equipped with a motorized stage. Cells were counted in one hemineuromere of segments T2 and T3, and from A3 to A5. To this purpose, cells in each section of the stack were marked using Adobe Photoshop. To avoid marking cells that had been marked in a previous section of the stack, subsequent sections were projected on top of each other and compared. The marked cells counted in each section were added to give the sum of all cells in one stack.

### BrdU labeling

BrdU (Sigma) was injected as previously described (Prokop and Technau, 1991). Injected embryos were allowed to develop until stage 17 at which point fillet preparations of the CNS were made and fixed in 18% formaldehyde for 2 minutes. After washing, the preparations were treated for 4 minutes with 2N HCl and blocked in 10% goat serum for 15 minutes. Antibody staining was performed as described above.

### Dil labeling

Dil labeling was performed as previously described (Bossing et al., 1996). Embryos from the *Df(3L)H99/TM6*, *ubi-GFP* fly stock were labeled. Heterozygous embryos were used as controls, as their CNS lineages did not differ from the published description of the wild type (see Bossing et al., 1996; Schmidt et al., 1997). The *Df(3L)H99* homozygous embryos were distinguished on the basis of head involution and thicker midline phenotypes. Clones were imaged using the Zeiss Axioskop 2 microscope and the images processed as described above. For illustrations, a Zeiss Axioplan microscope with a Camera lucida was used and the drawings produced using Adobe Illustrator software.

## RESULTS

We began our investigations by comparing the CNS morphology and total CNS cell number in wild-type (wt) embryos with PCD-deficient embryos homozygous for the deficiency *Df(3L)H99 (H99)* (White et al., 1994). One typical feature of *H99* embryos is a variably penetrant defect in head involution, visible from stage 15 to the end of embryogenesis (Abbot and Lengyel, 1991). In other tissues, these embryos show a range of phenotypes from problems with germ-band retraction (the earliest phenotype we were able to observe) and defects in gut development and CNS condensation, to those with hardly any macroscopically visible phenotype. In order to maximize our chances of observing differences between the wt and *H99* CNS, we analyzed embryos at late developmental stages (late 16 or early 17), and we considered cases both with and without defects in CNS condensation, as this did not seem to affect our observations.

### Comparison of morphology and cell number in the CNS of wt and *H99* embryos

As a consequence of the lack of PCD, the CNS in late *H99* embryos is wider than in wt, but it has a fairly normal appearance. The midline is widened and disrupted due to the survival of several midline glia (Sonnenfeld and Jacobs, 1995; Zhou et al., 1995). As has been reported previously (Zhou et al., 1995; Dong and Jacobs, 1997), the commissures and the longitudinal connectives, visualized by BP102 staining, are broadened and the junctions between them thickened due to additional axons, but their pattern is not changed (Fig. 1A,B). This indicates that at least some of the supernumerary neurons differentiate and extend axonal projections within the normal commissures and longitudinal connectives. In general, the axons seem to find and follow their normal pathways in *H99* embryos, as there was no obvious phenotype in the FasII pattern (Fig. 1C,D). The three longitudinal fascicles formed and, apart from a variably 'bumpy' appearance, looked similar to wt. The peripheral transverse, segmental and intersegmental nerves appeared normal, as well as the four nerve branches (SNa-d) (data not shown). The

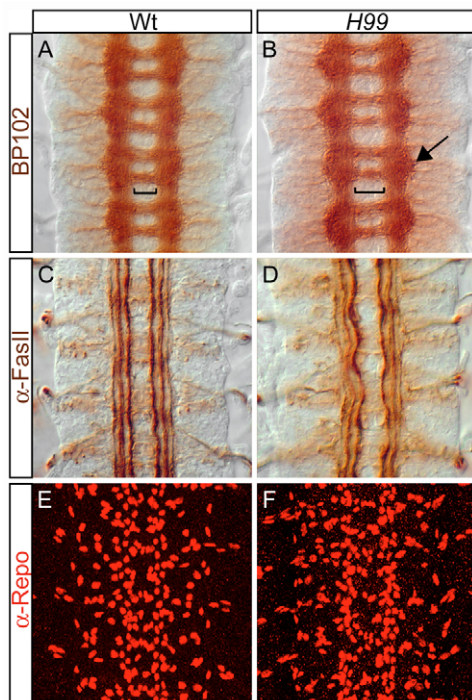

**Fig. 1. The CNS of homozygous *H99* embryos is not grossly deformed. (A,B).** Axon tracts are visualized using the BP102 antibody in wt (A) and *H99* (B) embryos. Their pattern is similar, although thickened junctions between the longitudinal connectives and the commissures (arrow), and a widened midline (bracket) are visible in *H99*. Note that the CNS of *H99* embryos is generally wider than that of wt due to additional cells. (C,D) FasII staining of axons reveals a variably altered pattern. The *H99* embryo shown in D has a more extreme phenotype in that the fascicles are somewhat disordered and fuzzy. (E,F) Glial cells, visualized with the anti-Repo antibody. A stack of scans was made throughout the CNS and the scans then projected together to show all Repo-positive cells. The positioning of glia is only slightly affected in *H99*. All images show four abdominal segments (A3 to A6) of late stage 16 embryos; anterior is up.

nerves all appeared to be of normal thickness and it was difficult to tell whether they contained supernumerary axons. The glia pattern, apart from a moderate misplacement of some cells, was also surprisingly normal, both in the VNC (Fig. 1E,F) and in the periphery (data not shown). Also, as explained in more detail below, the number of Repo-positive glial cells was unaltered in *H99* embryos. We conclude that the CNS structure in late *H99* embryos is not drastically affected at the macroscopic level, although there must be a large number of additional cells present.

We then determined the number of additional cells in these embryos. We counted all cells within specific segments of the VNC of stage 16 and 17 wt and *H99* embryos (for practical reasons, counting was restricted to a small number of embryos; see Materials and methods). Two thoracic (T2 and T3) and three abdominal (A3 to A5) hemisegments were counted per embryo and the results compared (Fig. 2). In wt embryos, the cell number in the thorax dropped by about 30% from mid-stage 16 ( $503 \pm 31$ ,  $n=8$ ) to stage 17 ( $354 \pm 58$ ,  $n=8$ ;  $P<0.001$ , two-tailed  $t$ -test), suggesting that there is a high occurrence of cell death near the end of embryogenesis. The same was true for the abdominal hemisegments (about 26% reduction):  $386 \pm 12$  ( $n=12$ ) at mid-stage 16 and  $286 \pm 34$  ( $n=12$ ) at stage 17 ( $P<0.001$ ). In *H99* embryos at mid-stage 16, average cell

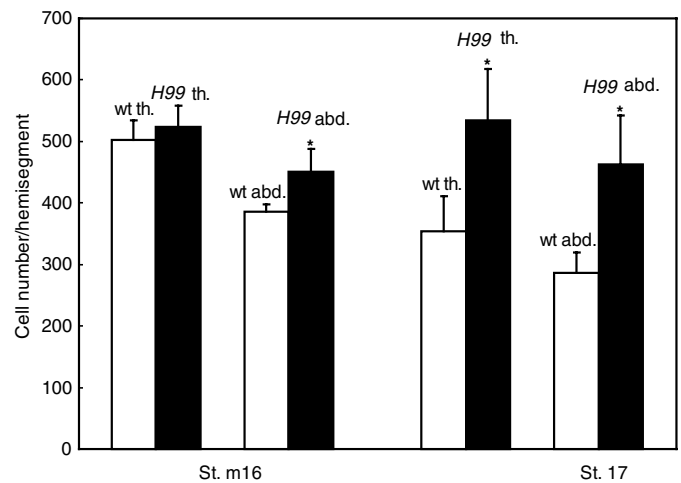

**Fig. 2. CNS cell count comparison of mid-stage 16 and stage 17 wt and *H99* embryos.** White and black bars represent cell counts from wt and *H99* embryos, respectively. For exact numbers see text. Asterisks mark statistically significant differences between wt and *H99* ( $P<0.001$ , two-tailed  $t$ -test). The thoracic CNS shows a difference between wt and *H99* only at stage 17. The abdominal part of the CNS of *H99* embryos contains more cells already at mid-stage 16, and the difference increases further at stage 17. th, thorax; abd, abdomen.

numbers per thoracic hemisegment (hs) ( $524 \pm 34$ ,  $n=10$ ) and per abdominal hs ( $451 \pm 36$ ,  $n=12$ ) were slightly higher than in wt. Despite the greater variability in the *H99* strain, the difference between the wt and *H99* abdominal cell counts is statistically significant ( $P<0.001$ ). In contrast to wt, cell numbers in *H99* did not significantly change from stage 16 (see above) to 17:  $534 \pm 83$  ( $n=10$ ) in thoracic neuromeres and  $462 \pm 80$  ( $n=18$ ) in abdominal neuromeres. At stage 17, we observed considerable differences between wt and *H99* embryos in both thoracic [ $354 \pm 58$  ( $n=8$ ) and  $534 \pm 83$  ( $n=10$ ), respectively] and abdominal segments [ $286 \pm 34$  ( $n=12$ ) and  $462 \pm 80$  ( $n=18$ ), respectively] (Fig. 2). The difference is statistically significant in both cases ( $P<0.001$ ).

The supernumerary cells in the CNS of *H99* embryos are most likely to be cells whose fate in wt would be PCD. It is, however, also conceivable that at least some of these cells derive from the continuing division of NBs which would normally undergo PCD after they have generated their progeny, or from the division of ganglion mother cells (GMCs) that are born, but normally undergo apoptosis without dividing. To test this, we performed BrdU labeling experiments. It has been shown that in the wt VNC, there are few divisions taking place after stage 16 (Prokop and Technau, 1991). In *H99* embryos injected with BrdU at early stage 16 and fixed at late stage 17, there were only a few more labeled cells than in wt embryos injected at the same stage (data not shown). When BrdU was injected at early stage 17, we found two classes of *H99* embryos at late stage 17: those that differed little from wt (Fig. 3, compare A,B), and those with a greater number of labeled cells than in the wt (Fig. 3, compare A,C). These results show that some of the supernumerary cells in *H99* embryos are cells that are never born in the wt CNS. Also, the variability in the BrdU uptake within the *H99* mutant strain appears to be a consequence of surviving NBs or GMCs either not dividing at all, or going through a variable number of divisions. We also observed a difference in the amounts of BrdU-labeled cells between the thorax and abdomen of *H99* embryos injected at early stage 17 (Fig. 3B,C). In the thoracic region, the

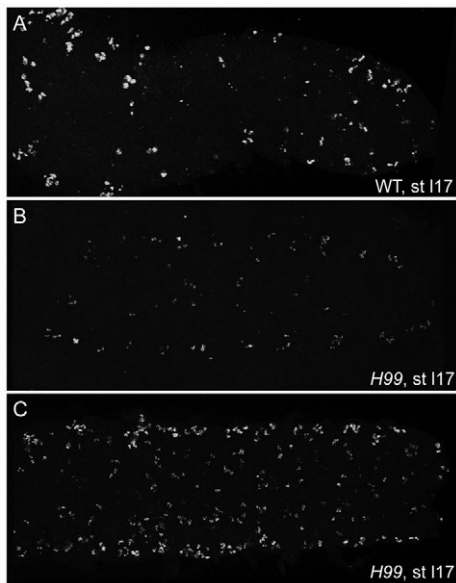

**Fig. 3. BrdU staining in late stage 17 wt and *H99* embryos.** All embryos were injected at early stage 17. (A) Wt VNC. Sporadic staining can be seen in the abdominal segments. In the thoracic region, BrdU-labeled cells are found only in the very lateral region of each hemisegment. (B,C) VNCs of two *H99* embryos, representing the two classes of staining we found in *H99* mutants. One shows a similar amount of staining as in wt (B), whereas the other has many more BrdU-positive cells (C). In both cases, there is a concentration of dividing cells in the lateral region of each abdominal hemisegment. The thoracic segments in B and C show reduced staining in the medial regions. Anterior is to the left in all images.

majority of BrdU-labeled cells were lateral, whereas in the abdomen the labeled cells were distributed more equally between the lateral and medial regions of each segment. There were fewer cells stained in the thoracic region in general, which is in agreement with the previously published observation that the majority of abdominal NBs undergo PCD, whereas the thoracic ones mostly enter quiescence at the end of embryogenesis (Truman and Bate, 1988).

### Temporal profile of cell death throughout embryonic CNS development

In order to examine the occurrence of PCD in the developing nervous system of the *Drosophila* embryo, we made use of a polyclonal antibody raised against the activated form of the human caspase-3 protein. This antibody has previously been shown to recognize apoptotic cells in *Drosophila* tissues (Brennecke et al., 2003), and it does not show any staining in homozygous *H99* embryos (data not shown). In the CNS of wt embryos, PCD first appeared around the beginning of stage 11. PCD then continued to occur until the end of embryonic development (Fig. 4) (see also Abrams et al., 1993). The number of dying cells per abdominal hemisegment increased steadily from stage 11 to reach a peak in mid-development (stage 14), at about 20 cells/hs ( $n=33$ ). After this point, the number of dying cells stayed more or less constant until the end of embryonic development. As has been reported previously (Abrams et al., 1993), the spatial distribution of activated Caspase-3-positive cells at any stage shows both a regular, segmentally repetitive distribution, as well as a random one (data not shown).

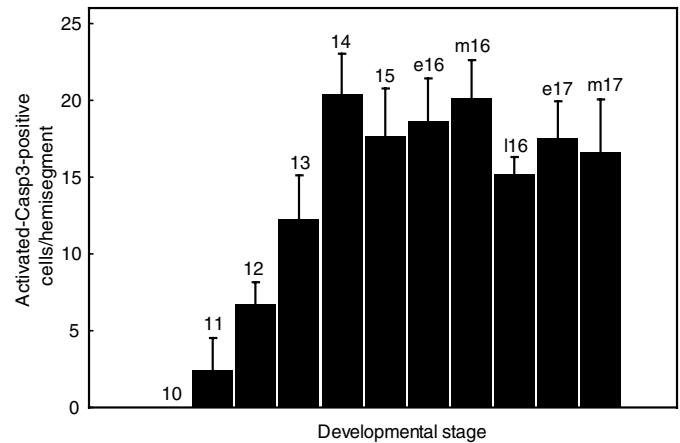

**Fig. 4. Profile of Caspase-dependent PCD in the embryonic CNS.**

Activated-Caspase-3-positive cells in the wt embryonic CNS were counted in abdominal hemisegments over the course of development. PCD in the CNS begins at stage 11 and increases until stage 14. The levels remain high until the end of embryonic development. Bars represent s.d.;  $n=36-51$  (for all stages). Developmental stages are indicated above the bars.

### Dil labeling of neuroblast lineages in *H99* embryos

We next investigated the development of individual NB lineages in embryos that lack PCD, with a view to determining how many additional cells, if any, each NB lineage would make, how the additional cells develop (e.g. whether they differentiate, migrate, extend axons, etc.), and how their potential axons project. We performed labeling experiments with the cell lineage tracer Dil (Bossing and Technau, 1994) in homozygous *H99* embryos (preferentially in the abdomen). We obtained clones for almost all 30 NBs, analyzed their cell number and axonal projections and compared them with the published descriptions of wild-type clones (Bossing et al., 1996; Schmidt et al., 1997; Schmid et al., 1999). The results are summarized in Table 1 (for selected images see Figs 5, 6, and Figs S1, S2 in the supplementary material). The clones were sorted into four groups on the basis of their appearance: (1) clones showing no difference in cell number or morphology as compared with wt; (2) clones with additional cells and wild-type-like axonal projections; (3) clones with additional cells and axonal projections different from those in wt counterparts; and (4) clones showing no tagma-specific phenotype in wt, but differing between abdomen and thorax in *H99*. The groups are described and the most interesting examples of clones are shown below.

#### 1. Clones with no additional cells

Abdominal NB1-1a was the only NB lineage which we repeatedly ( $n=5$ ) found to be unchanged in *H99* embryos (two clones of 10 cells and three clones of 11 cells) (Fig. 5A-C, Table 1). The wt consists of 9-11 cells (three subperineurial glial cells, the aCC motoneuron, the pCC interneuron, and a cluster of 4-6 interneurons) (Udolph et al., 1993). In only one out of five cases in *H99* did we observe an axon which branched out of the typical axon bundle (data not shown); however, the clone contained a wild-type number of cells (11) and we therefore assume that the axon had been misrouted. We observed two other lineages (thoracic NB1-3t and abdominal NB6-4a) in which the *H99* embryos did not seem to differ from their wt counterparts (Table 1 and data not shown); however, due to a low sample number ( $n=1$ ), we consider these observations inconclusive.

**Table 1. Comparison of Dil-labeled clone sizes and projections between wt and *H99* embryos**

| NB                | Group <sup>†</sup> | Cell # (wt) | Cell # ( <i>H99</i> ) | n ( <i>H99</i> ) | Atypical projections |
|-------------------|--------------------|-------------|-----------------------|------------------|----------------------|
| 1-1a*             | 1                  | 9-11        | 10-11                 | 5                | –                    |
| 1-1t              | ND                 | 10-16       | ND                    | –                | ND                   |
| 1-2a*             | 4                  | 16-24       | 21-25                 | 3                | –                    |
| 1-2t              | 4                  | 16-24       | 30                    | 1                | –                    |
| 1-3a              | ND                 | 9-13        | ND                    | –                | –                    |
| 1-3t              | 1                  | 9-13        | 12                    | 1                | –                    |
| 2-1               | 2                  | 5-10        | 16-25                 | 8                | –                    |
| 2-2a              | 2                  | 12-16       | 17-19                 | 2                | –                    |
| 2-2t              | 2                  | 12-14       | 20                    | 1                | –                    |
| 2-4a              | 2                  | 7-8         | 12-18                 | 3                | –                    |
| 2-4t              | ND                 | 8-12        | ND                    | –                | ND                   |
| 2-5a              | 2                  | 16-21       | 23-25                 | 2                | –                    |
| 2-5t              | 2                  | 16-21       | 24                    | 1                | –                    |
| 3-1a              | 2                  | 10-12       | 17-23                 | 4                | –                    |
| 3-1t              | ND                 | 12-15       | ND                    | –                | ND                   |
| 3-2a*             | 2                  | 10-18       | 18-19                 | 5                | –                    |
| 3-2t              | 2                  | 10-18       | 16-19                 | 2                | –                    |
| 3-3a              | 4                  | 10-13       | 13-22                 | 7                | –                    |
| 3-3t              | 4                  | 10-13       | 12                    | 1                | –                    |
| 3-5a              | 2                  | 19-24       | 26-31                 | 8                | –                    |
| 3-5t              | 2                  | 19-24       | 26                    | 1                | –                    |
| 4-1               | 2                  | 12-18       | 26                    | 1                | –                    |
| 4-2a              | 3,4                | 10-16       | 17-25                 | 2                | +                    |
| 4-2t              | 3,4                | 10-16       | 16                    | 1                | +                    |
| 4-3a              | 4                  | 8-13        | 15-22                 | 3                | –                    |
| 4-3t              | 4                  | 8-13        | 8-13                  | 2                | –                    |
| 4-4a              | 2                  | 8-11        | 13-17                 | 4                | –                    |
| 4-4t              | 2                  | 8-11        | 10-13                 | 3                | –                    |
| 5-1a              | 2                  | 2-4         | 5-6                   | 2                | –                    |
| 5-1t <sup>†</sup> | 2                  | 2-4         | 6-7                   | 2                | –                    |
| 5-2a              | 4                  | 17-26       | 25-32                 | 8                | –                    |
| 5-2t              | 4                  | 17-26       | 25                    | 1                | –                    |
| 5-3               | 3                  | 9-15        | 19-27                 | 7                | +                    |
| 5-4a              | 2                  | 4-5         | 10-13                 | 3                | –                    |
| 5-4t              | 3                  | 6-10        | 15                    | 1                | –                    |
| 5-5a              | 2                  | 6-9         | 12-15                 | 4                | –                    |
| 5-5t <sup>†</sup> | 2                  | 6-9         | 12-15                 | 5                | –                    |
| 5-6a              | 2                  | 7-10        | 13                    | 1                | –                    |
| 5-6t              | ND                 | 14-19       | ND                    | –                | ND                   |
| 6-1               | 2                  | 10-16       | 17-25                 | 8                | –                    |
| 6-2a*             | 4                  | 8-16        | 13-14                 | 4                | –                    |
| 6-2t              | 4                  | 8-16        | 18-19                 | 2                | –                    |
| 6-4a              | 1                  | 2           | 2                     | 1                | –                    |
| 6-4t              | 2                  | 7-9         | 10                    | 1                | –                    |
| 7-1a              | 2                  | 16-22       | 18-29                 | 3                | –                    |
| 7-1t              | 2                  | 16-22       | 24-27                 | 4                | –                    |
| 7-2               | 3                  | 8-14        | 21-28                 | 2                | +                    |
| 7-3a              | 2                  | 3-5         | 9                     | 4                | –                    |
| 7-3t              | 2                  | 3-5         | 10                    | 1                | –                    |
| 7-4a              | 3                  | 12-19       | 23-30                 | 6                | +                    |
| 7-4t              | 3                  | 12-19       | 25                    | 1                | +                    |

\*Candidate abdominal pNBs.

<sup>†</sup>Candidate thoracic NBs that undergo apoptosis.

<sup>†</sup>The group that each NB belongs to is indicated as follows: 1, Clones with no additional cells; 2, Clones with additional cells and wild-type-like axonal projections; 3, Clones with additional cells and atypical axonal projections; 4, Clones whose phenotypes differ between abdomen and thorax.  
a, abdominal clones; t, thoracic clones.

## 2. Clones with additional cells and wild-type-like axonal projections

For 14 NB lineages we obtained clones in *H99* embryos which clearly and repeatedly contained more cells than their wt counterparts but showed a wild-type-like projection pattern. These were NB2-1, NB2-2a, NB2-4a, NB2-5, NB3-1a, NB3-2, NB3-5,

NB4-4, NB5-1, NB5-4a, NB5-5, NB6-1, NB7-1 and NB7-3 (for details see Table 1). All of these clones were easily identifiable on the basis of their axonal projections (for selected clones, see Figs S1, S2 in the supplementary material). Due to the lack of information on axon numbers per fascicle in wt clones, and because of tight packaging of axons in the bundles, we were generally not able to determine whether the projections in *H99* contained additional axons or not. The only exception was NB7-3, which contains only four cells in the wt: three contralaterally projecting interneurons (EW1-3) and one ipsilaterally projecting motoneuron (GW) (Fig. 5D) (Higashijima et al., 1996; Bossing et al., 1996; Dittrich et al., 1997; Schmid et al., 1999; Novotny et al., 2002). We obtained five examples of this clone in *H99* embryos, comprising 9-10 cells (Fig. 5E,F). Although their projections followed the wt pattern, we were able to identify an additional motoneuron in all five cases. Regarding the interneuronal projections, it was not possible to determine the number of axons they contained, as these are bound together too tightly.

We found four further NBs to have larger clones in *H99* than in wt (NB2-2t, NB4-1, NB5-6a and NB6-4t) (Table 1 and data not shown) but as we only obtained one clone for each of these, we can draw no solid conclusion about PCD in these lineages.

## 3. Clones with additional cells and atypical axonal projections

We obtained clones of four NB lineages (NB4-2, NB5-3, NB7-2 and NB7-4) in *H99* embryos which showed additional cells and axonal projections that have not been observed in their wt counterparts.

NB4-2 contains 10-16 cells (7-13 interneurons, 3 motoneurons) in wt (Bossing et al., 1996) (Fig. 6A). We obtained three clones of this lineage in *H99*, one thoracic containing 16 cells, and two abdominal with 17 and 25 cells (Table 1, Fig. 6B,C). One of the abdominal clones exhibited a wild-type-like projection pattern, whereas the other abdominal and the thoracic clone contained two additional motoneurons each, whose axons project ipsilaterally in the anterior direction. This lineage can also be placed in group 4, and as such is mentioned again below.

NB5-3 is another example of a lineage with additional cells and projections in *H99* (Table 1, Fig. 6D-F). In wt this lineage contains 9-15 cells. These are mostly interneurons, except for one motoneuron in the thoracic and first abdominal segments (Fig. 6D) (Schmid et al., 1999). The cells are arranged in two clusters, one lying medially and projecting across the anterior commissure, and the other lying laterally and projecting through the posterior commissure (Bossing et al., 1996; Schmidt et al., 1997; Schmid et al., 1999). We obtained seven abdominal clones in *H99* embryos, containing 19-27 neurons. In two of these clones, we found at least one additional ipsilateral axon projecting anteriorly (Fig. 6E,F), and in four further clones we identified structures that resembled the beginnings of axons growing out in the same direction. In addition, all seven clones contained a motoneuron. As the labeled clones were found in various abdominal segments (A1, A2, A3, A6 and A7), we conclude that in the wt the motoneuron is born in all segments and undergoes PCD (most likely before growing an axon) in A2 to A8, thus representing an example of segment-specific cell death.

The NB7-2 lineage normally consists of 8-14 interneurons (mostly 12), whose projections form two fascicles. One traverses contralaterally across the posterior commissure (7-2Ic) and the other extends ipsilaterally to the posterior (7-2Ii) (Fig. 6G) (Bossing et al., 1996). In *H99*, we obtained two clones, with 21 and 28 neurons, that project an additional axon contralaterally through the posterior commissure, alongside the wild-type-like fascicle (Table 1, Fig.

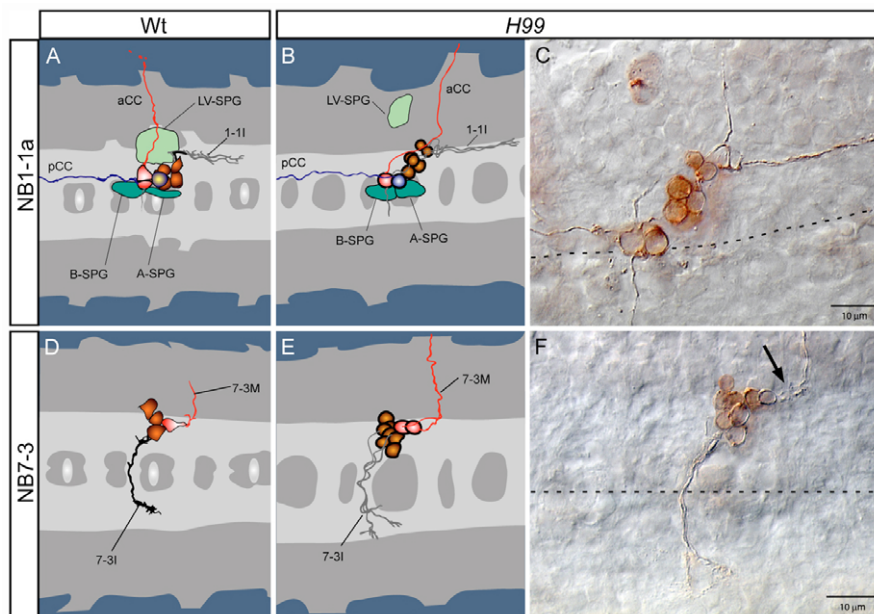

**Fig. 5. Dil-labeled clones of NB1-1a and NB7-3 in *H99* embryos.** Each plate shows a semischematic illustration of a wt and an *H99* clone, and the corresponding image of the *H99* clone. Glia are depicted in green, motoneurons in red. Dashed lines indicate the CNS midline. (A–C) No difference can be seen between NB1-1a in wt (A) and *H99* (B,C). Shown is an *H99* clone containing 11 cells (including three glial cells). Both the cell numbers and the axonal projection pattern are unchanged in *H99*. (D–F) NB7-3 consists of more cells in *H99* (E,F) than in wt (D), including an additional motoneuron that projects its axon outside the CNS (arrow). The image shows an abdominal *H99* clone with 9 cells.

6H,I). We believe this to be a separate axon, and not a case of loose fasciculation, because the position of the axon was exactly the same in both clone examples, i.e. it comes from the cells lying laterally within the clone. In a loose fascicle, one would expect the axons to be positioned more variably and fairly close together.

The NB7-4 lineage contains 8–12 interneurons and 5–7 glial cells in the wt. The interneurons project contralaterally across the posterior commissure (Fig. 6J) (Schmidt et al., 1997). In *H99*, this lineage contained 18–24 neurons and 4–7 glia. Additional axons projected contralaterally through the anterior commissure of the next segment in all clones obtained (six abdominal and one thoracic, Fig. 6K,L).

NB5-4t also exhibited atypical projections in *H99* (see Fig. S2 in the supplementary material); however, as we obtained only one clone we cannot draw firm conclusions about this lineage.

#### 4. Clones whose phenotypes differ between abdomen and thorax

In six cases we obtained NB lineages which seemed differently affected in the abdomen and thorax of *H99* embryos. These were NB4-3, NB3-3, NB4-2, NB5-2, NB6-2 and NB1-2. In wt, NB4-3 consists in both tagma of 8–13 motoneurons whose projections all leave the CNS through the segmental nerve (Schmidt et al., 1997). This lineage often comprises an epidermal and a sensory subclone, which we have also observed in two out of five cases in *H99* (data not shown). The cell numbers in these epidermal subclones did not differ from wt. However, the abdominal CNS clones ( $n=3$ ) all showed a higher cell number than in wt (15, 15 and 22), whereas the thoracic clones ( $n=2$ ) did not (12–13 and 8) (Table 1). As the axonal projections of NB4-3 in *H99* did not differ from those in wt, we conclude that the additional cells either do not differentiate and extend axons, or they project through the wt fascicles. NB3-3, NB5-2 (Table 1 and data not shown) and NB4-2 (Fig. 6A–C), showed the same kind of phenotype, namely a normal cell number in the thoracic, and more cells in abdominal clones. However, more thoracic clones would need to be labeled ( $n=1$  in each case) in order to obtain conclusive data.

The opposite phenotype was observed for NB6-2 (Table 1). This NB normally makes 8–16 interneurons, and also shows no tagma-specific differences (Bossing et al., 1996). We obtained four abdominal NB6-2 clones which did not differ from wt (13, 13–14, 13–

14 and 14 cells), whereas the two thoracic clones showed an increase in cell number (18 and 19 neurons). NB1-2 also appeared similar to wt in the abdomen, and contained more cells in the thorax (Table 1). However, no solid conclusion could be drawn about NB1-2 based on only one thoracic clone.

#### Identification of dying cells

We next attempted to identify the dying cells in the CNS more closely. To do this, we selected a number of molecular markers that are known to be expressed in smaller or larger groups of cells in the VNC [e.g. Repo, dHb9 (Exex – Flybase), Eve], and compared the extent of their expression in late developmental stages of wt and homozygous *H99* embryos. We reasoned that any cell which is determined to express one of these markers, but undergoes cell death at some point in development, would be likely to continue to express this marker if PCD is prevented. In fact, this has been shown for apoptotic midline glia (Sonnenfeld and Jacobs, 1995; Zhou et al., 1995) and other apoptotic cells in the CNS (Novotny et al., 2002; Miguel-Aliaga and Thor, 2004). In *H99* embryos, we therefore expected to see all the additional cells which continued to express a particular marker. In parallel, we examined the overlap between the activation of Caspase-3 and individual marker expression in various developmental stages of wt embryos, in order to determine the time of death for some of these cells. We chose embryos in mid-development (stages 13 and 14) as our analysis of cell death distribution indicated that it is most frequent in these stages. We also examined embryos in a late developmental stage (late stage 16) to identify cells that are removed towards the end of embryogenesis.

The glial marker Repo did not show any obvious difference in the extent of expression between wt and *H99* embryos (see Fig. 1E,F). We therefore performed precise cell counts for Repo-expressing cells at late stage 16, including glia in the CNS and the peripheral glia that are born in the CNS and then migrate out along the nerves. In wt embryos, a total of  $34.17 \pm 0.65$  cells/hs were counted ( $n=30$ ), and in *H99* we found  $34.77 \pm 0.73$  cells/hs ( $n=30$ ). We conclude that the number of glial cells is not significantly changed in *H99* embryos, and that the great majority of dying cells in the embryonic CNS are neurons or undifferentiated cells.

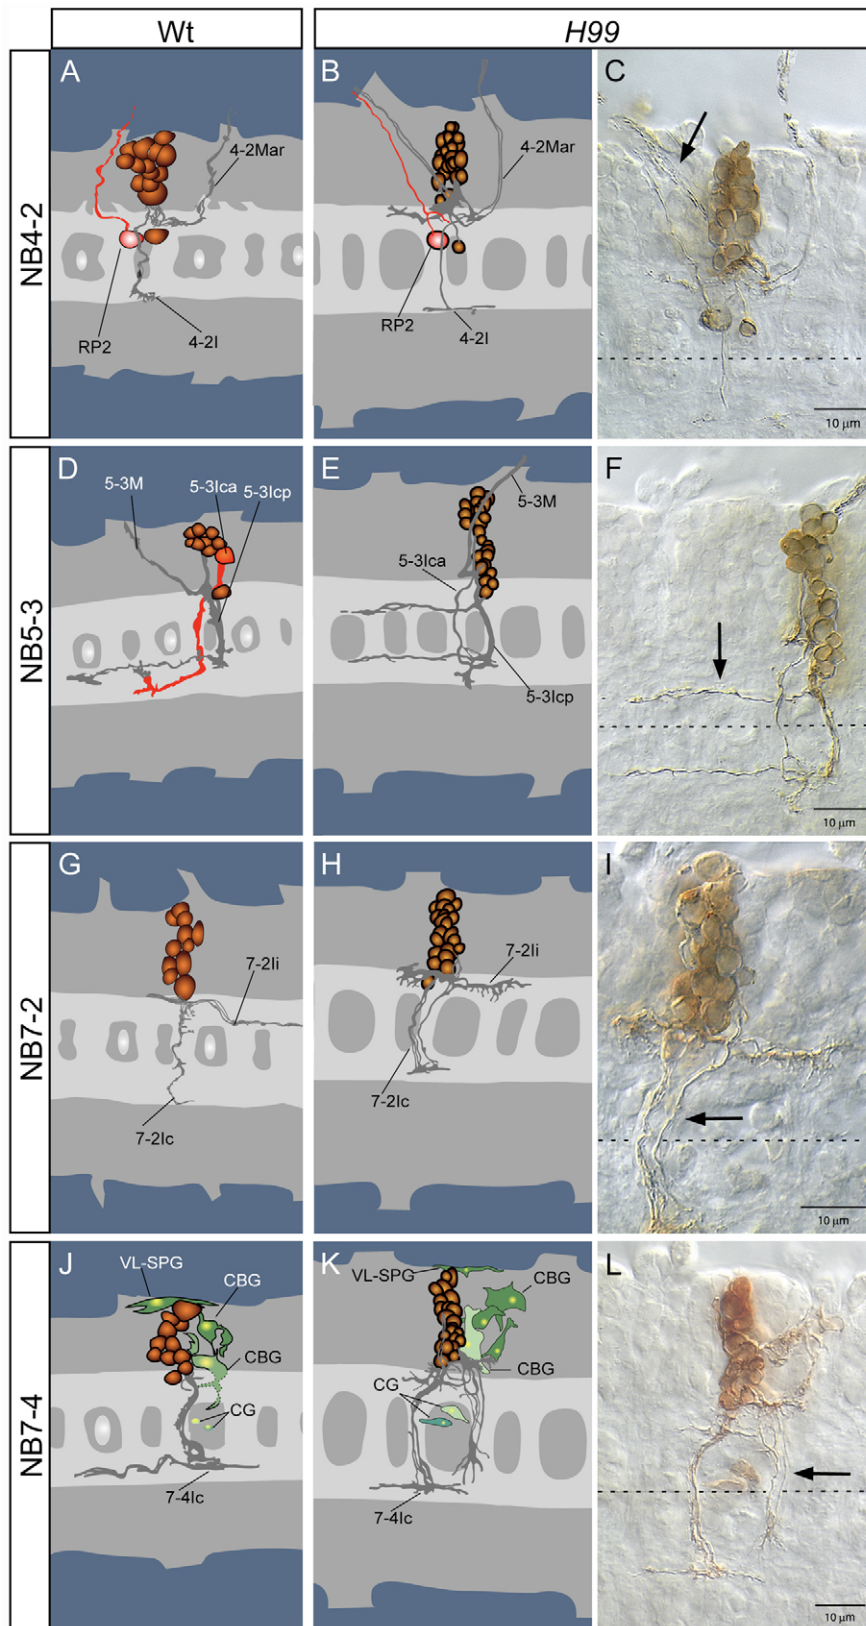

**Fig. 6. Dil-labeled clones of NB4-2, NB5-3, NB7-2 and NB7-4.** Each plate shows an illustration of a wt and an *H99* clone, and the corresponding image of the *H99* clone. Glia are depicted in green, motoneurons in red. Dashed lines indicate the CNS midline. **(A–C)** The NB4-2 lineage has two motoneuronal projections in wt (A). In *H99*, there is a third motoneuronal axon (arrow in C) projecting ipsilaterally through the posterior root of the intersegmental nerve. The image shows an abdominal clone comprising 25 cells. **(D–F)** The wt NB5-3 shows an ipsilateral motoneuronal and two contralateral interneuronal projections (D). In *H99* (E,F), there is an additional ipsilateral interneuronal projection extending anteriorly (arrow in F). Shown is an image of an abdominal clone containing 25 cells. **(G–I)** In the wt, NB7-2 interneurons form two fascicles, an ipsilateral one extending posteriorly, and a contralateral one projecting through the posterior commissure (G). The *H99* clones (H,I) show another contralateral projection, extending alongside the wt one (arrow in I). Shown is an abdominal *H99* clone with 21 cells. **(J–L)** In the wt, NB7-4 interneurons form one fascicle that traverses contralaterally through the posterior commissure (J). In *H99* (K,L), NB7-4 clones exhibit an atypical projection that runs through the anterior commissure of the next segment (arrow in L). Shown is an abdominal clone with 29 cells.

As anticipated, markers expressed in large groups of cells, such as dHb9, Gooseberry and Engrailed (Fig. 7A,B and data not shown), stained more cells in *H99* than in wt. Most of these markers also showed, at least in some of the developmental stages examined, overlap with activated Caspase-3 staining in a

few cells in wt embryos (Fig. 7C and data not shown). In most cases, we were not able to identify these cells due to the extent of marker expression. Closer identification was possible only for cells expressing dHb9, a homeodomain protein expressed in a specific subset of neurons (Broihier and Skeath, 2002). At stage

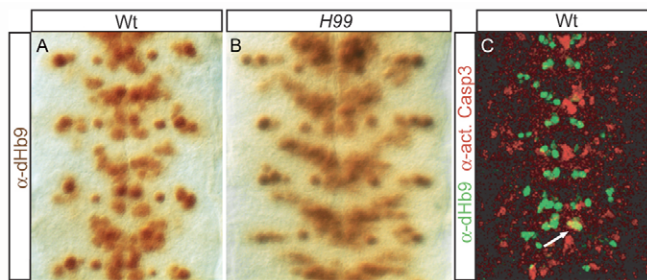

**Fig. 7. Caspase-dependent PCD of dHb9-expressing cells.** (A,B) At late stage 16, *H99* mutants (B) have more dHb9-positive cells than wt (A). (C) Activated-Caspase-3 staining reveals that some of these cells die at stage 14 (arrow). In this case, the dying cell lies in a position corresponding to the RP (1, 3, 4 or 5) neurons. dHb9 staining is in green, activated Caspase-3 in red. Anterior is up in all images.

14, for example, we found cells that most likely correspond to one of the RP motoneurons (RP 1, 3, 4 or 5), co-labeled with activated Caspase-3. This cell death is specific to segments A7 and A8, and activated Caspase-3 staining of this cell was detected at this stage in 27.3% of hemisegments analyzed ( $n=22$ ; Fig. 7C).

Some molecular markers which are expressed in small subsets of cells in the VNC showed, as has already been reported (De Graeve et al., 2004; Novotny et al., 2002), interesting pattern changes in *H99* embryos (Fig. 8). Ladybird early (Lbe) is a homeobox transcription factor involved in several developmental processes (Jagla et al., 1994; Jagla et al., 1997; Jagla et al., 1998). In the embryonic CNS it is required for the correct development of glial cells derived from NB5-6 and of neurons derived from NB5-3 (De Graeve et al., 2004). De Graeve et al. also showed that late *H99* embryos have additional Lbe-positive neuronal cells in the VNC. We made the same observation, and determined that these Lbe-positive cells die in stages 13 and 14 (Fig. 8A-C). As for the dHb9 marker, this suggests that these cells die prior to or at an early stage of differentiation. The experiments we are currently undertaking should provide us with the possibility to precisely identify each of these cells based on the combination of markers it expresses. Another marker we used, the zinc-finger protein Eagle (Eg), has been described as being required for proper differentiation of cells in four NB lineages, NB2-4, NB3-3, NB6-4 and NB7-3 (Higashijima et al., 1996; Dittrich et al., 1997). We focused our analysis on the NB7-3 lineage, which consists of only four neurons: three interneurons and one motoneuron. Previously published data show that PCD is involved in the formation of this lineage, as late *H99* embryos have additional cells in the NB7-3 lineage (Novotny et al., 2002). It has been shown that these cells are not fully differentiated, and that the death of some of these cells depends on Notch activity (Lundell et al., 2003). Our results are in agreement with the published data (Fig. 8D,E), although we also observed apoptotic Eg-positive cells at stage 13 (not shown) and at late stage 16 (Fig. 8F). We identified the cell undergoing PCD at late stage 16 as the GW motoneuron, and determined that it is removed specifically in segments T3 to A8 in 38.9% of cases ( $n=108$ ). We thus showed that differentiated NB7-3 progeny can also undergo PCD. In T1 and T2 this cell survives into larval stages. Even-skipped (Eve), another marker we used, is a homeodomain transcription factor expressed in a very restricted and well-described pattern in the embryonic CNS (Frasch et al., 1987; Doe et al., 1988). Comparing

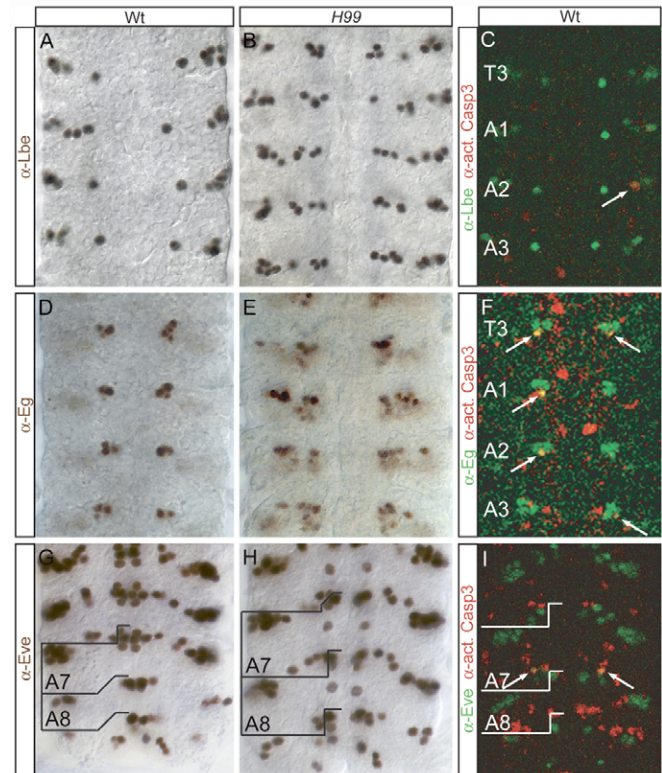

**Fig. 8. Caspase-dependent PCD of Lbe-, Eg- and Eve-expressing cells.** (A-C) Lbe-positive cells, most likely from the NB5-3 lineage, are present in higher numbers in *H99* mutants (B) than in wt (A). Apoptotic Lbe-positive cells can be seen at stage 14 (arrow in C). (D-F) The Eg-expressing NB7-3 lineage also shows too many cells in *H99* (E, compare with wt in D). The GW motoneuron undergoes apoptosis in segments T3 to A8 at late stage 16 (arrows in F). (G-I) Eve-positive U motoneurons are not present in segments A7 and A8 in wt embryos (G). In *H99*, these cells survive (H). U neurons in A7 and A8 die at stage 14 (arrows in I). Lbe staining in C, Eg in F and Eve in I are in green, activated Caspase-3 in red. A,B,D-H show late stage 16 embryos; C,I show stage 14 embryos. Lines in G-I demarcate segments A7 and A8 for clarity. Anterior is up in all images.

the Eve expression pattern in anterior abdominal segments at late stage 16, we did not see any difference between wt and *H99* embryos. However, some or all of the U neurons in segments A6 to A8 of wt embryos were missing, whereas they were still present in homozygous *H99* embryos (Fig. 8G,H). These motoneurons, belonging to the NB7-1 lineage, underwent PCD in stages 14 and 15 as seen by Caspase-3 activation (Fig. 8I). Further experiments are underway to investigate possible factors that regulate PCD of these cells.

## DISCUSSION

Programmed cell death is an integral part of animal development, and as such is also involved in spatial patterning of tissues and organs. In the *Drosophila* embryonic CNS, factors regulating this developmental cell death have just begun to be identified. In order to establish a basis for further investigations into these mechanisms, we set out to analyze the distribution of PCD throughout CNS development, and to identify apoptotic cells in order to use them as models for these investigations.

### The CNS of PCD-deficient embryos is not drastically affected at the macroscopic level

In our analysis of PCD distribution we found that, macroscopically, the CNS of wt and PCD-deficient (*H99*) embryos do not show large differences. Our observations indicate that the supernumerary cells do not disturb developmental events in the CNS of *H99* embryos, such as cell migration and axonal pathfinding. The glial cells mostly find their appropriate positions accurately. The DiI-labeled NB lineages were, in the majority of cases, easily identifiable based on their shape, position and axonal pattern, despite the supernumerary cells. The FasII pattern showed that the axonal projections form and extend along their usual paths. In fact, the supernumerary cells themselves are capable of differentiating i.e. expressing marker genes and extending axons, as shown by clones of several NBs and by cell marker expression analysis in *H99* (e.g. NB7-3).

### Pattern and degree of cell death in the ventral nerve cord

It has been shown that a large number of CNS cells undergo PCD during embryonic development (Abrams et al., 1993). The distribution of activated Caspase-3-positive cells in wt embryos suggests that the death of some cells is under tight spatial and temporal control, as revealed by their regular, segmentally repeated occurrence. Other dying cells were rather randomly distributed, suggesting a certain amount of developmental plasticity. The overall counts of Caspase-3-positive cells give an estimate of the numbers of dying cells at a given time. They indicate that PCD becomes evident in the CNS at stage 11 and is most abundant in the late embryo (from stage 14). It is however difficult to estimate the total number of apoptotic cells throughout CNS development by anti-Caspase-3 labeling, because the cell corpses are removed fairly quickly. We therefore counted the total number of cells per thoracic and abdominal hemineuromere in the late embryo. Comparison between stage 16 and stage 17 wt embryos indicates that 25-30 % of all cells are removed in both tagmata after stage 16, which in turn suggests that the total percentage of removed cells must be high, as PCD occurs at high levels already from stage 14 on. In comparison to the developing nervous system of *C. elegans*, where PCD removes about 10% of cells, and of mammals, where this number can be as high as 50-90%, PCD in the fly CNS appears to show an intermediate prevalence. This lends support to the hypothesis of an increasing contribution of PCD in shaping more advanced nervous systems during evolution.

Comparisons between wt and *H99* reveal, as expected, a greater number of cells in both tagmata of *H99* embryos (151% increase in the thorax and 162% in the abdomen at stage 17). These additional cells in *H99* may reflect the total number of cells normally undergoing cell death until stage 17. However, there is a large variability in the total number of cells, especially within the *H99* strain. In wt embryos, it seems to be more pronounced in the thorax and at stage 17, which might be a consequence of variable amounts of PCD occurring until this stage. The even higher variability within the *H99* strain (both in thorax and abdomen) is likely to reflect variable numbers of additional cell divisions. The great majority of abdominal NBs are normally removed by PCD after they have generated their embryonic progeny (Bray et al., 1989; White et al., 1994; Peterson et al., 2002), whereas in the thoracic neuromeres most of the NBs enter quiescence at the end of embryogenesis and continue dividing as postembryonic NBs in larval stages (Truman and Bate, 1988). Thus, there are few mitoses occurring in the wt CNS from stage 16 onwards (Prokop and Technau, 1991). Our BrdU labeling

experiments revealed a high number of BrdU-positive cells in some *H99* embryos injected at early stage 17. We assume that these are progeny of mitotic NBs and/or GMCs that survive and continue dividing, generating cells that do not exist in wt. Clones obtained by DiI labeling in *H99* confirm this conclusion (see below). Our finding that surviving cells divide already in the embryo complement the results of Peterson et al. (Peterson et al., 2002), who found that, in *reaper* mutants, NBs in the abdominal neuromeres survive and generate progeny in larval stages.

### Supernumerary cells can be specified as neurons but not as glia

Among the DiI-labeled clones in *H99* embryos, we obtained very few NB lineages which did not differ from their wt counterparts. The majority contained, as expected, supernumerary cells. In some cases we could identify axons projected by these cells, which shows they are specified as neurons. In fact, in three cases (NB4-2, NB5-3 and NB7-3), we found these additional cells to be specified as motoneurons. As additional axons within a fascicle were generally difficult to identify, it is possible that these are not the only lineages which make additional motoneurons in *H99*. Whether these cells are normally born and apoptose, or originate from additional divisions of surviving NBs or GMCs, cannot be determined from these experiments, but similar observations have been made for both cases. Lundell et al. (Lundell et al., 2003) have shown that the normally apoptotic progeny of NB7-3 can express the neuronal differentiation markers *Ddc* and *Corazonin* when cell death is prevented. Also, the additional progeny of the surviving NBs in the *reaper* mutant larvae express the neuronal marker *Elav*, showing that cells which are never born in the wt are capable of becoming neurons (Peterson et al., 2002). It is interesting that none of these cells, regardless of their origin, are specified as glia. We did not observe any additional glia in the NB clones in *H99* embryos, and we also found equal numbers of Repo-expressing glial cells in wt and *H99*. We conclude that PCD occurs almost exclusively in neurons and/or undifferentiated cells, and that lateral glia are not produced in excess numbers in the embryo. Furthermore, because it is likely that NBs, which normally die, stay in a late temporal window in *H99*, one could speculate that NBs in this window normally do not give rise to glia. Our results are not in agreement with the notion that LG are overproduced, and their numbers adjusted through axon contact (Hidalgo et al., 2001). Hidalgo et al. observe occasional apoptotic LG and it is possible that our method of counting does not allow a resolution fine enough to account for an occasional additional Repo-positive cell in *H99* embryos. However, if LG were consistently overproduced, we would expect to observe a higher number of glia in *H99* embryos. We assume that LG cell death may reflect a small variability in the number of cells needed, and not a general mechanism for adjusting glial cell numbers.

As already mentioned, we generally found no difference between Repo-expressing glia numbers in wt and *H99*. However, a small difference does become apparent when one separates the total cell counts into those in the CNS and those in the periphery:  $25.67 \pm 0.45$  cells/hs and  $28.42 \pm 0.64$  cells/hs for wt and *H99*, respectively, were counted in the CNS, whereas  $8.50 \pm 0.28$  cells/hs and  $6.35 \pm 0.82$  cells/hs for wt and *H99*, respectively, were found in the periphery. The reasons for this difference might be the greater width of the CNS in *H99* embryos, and that the cues required for proper migration of the peripheral glia are disturbed by additional cells. Alternatively, the difference might be due to differentiation defects in these cells.

### Atypical axonal projections in Dil-labeled *H99* clones

In addition to NB clones with too many cells and wild-type-like axon projections in *H99*, we also obtained some lineages whose clones exhibited atypical projection patterns. We found these projections to belong both to motoneurons (e.g. in NB4-2) and interneurons (e.g. NB5-3, NB7-2 and NB7-4). NB4-2 normally produces two motoneurons (RP2 and 4-2Mar) and 8-14 interneurons (Bossing et al., 1996). In two out of three NB4-2 clones in *H99* we found two additional motoneurons that project anteriorly, similar to RP2. One of the two clones was found in the thorax and had a normal cell number (16), whereas the other was abdominal and had too many cells (25). Thus, the two additional motoneurons are likely to be the progeny of divisions occurring in the wt, and not of an additional NB or GMC mitosis. The fact that the third NB4-2 clone (found in the abdomen and comprising 17 cells) did not show the same motoneuronal projections could be due to these cells not being differentiated at the time of fixation (we have occasionally observed clones of different ages in the same embryo), or they may not have differentiated at all. It would be interesting to determine the target(s) of these additional motoneurons and thereby perhaps gain insight into physiological reasons for their death. However, such an experiment has to await tools that allow us to specifically label the NB4-2 lineage, or these motoneurons, in the *H99* mutant background.

The other three lineages (NB5-3, NB7-2 and NB7-4) all have atypical interneuronal projections. The cells which these atypical axons belong to may represent evolutionary remnants that are not needed in the *Drosophila* CNS. Alternatively, they might have a function earlier in development and be removed when this function is fulfilled. Such a role has been shown for the dMP2 and MP1 neurons, which are born in all segments and pioneer the longitudinal axon tracts. At the end of embryogenesis these neurons undergo PCD in all segments except A6 to A8, where their axons innervate the hindgut (Miguel-Aliaga and Thor, 2004). It is known that some cells of the NB5-3 lineage express the transcription factor *Lbe*, and that *H99* mutants show about three additional *Lbe*-positive neurons per hemisegment, which mostly likely belong to NB5-3 (DeGraeve et al., 2003). Our Dil-labeling results complement this finding in that we also find four or more additional neurons in *H99* clones. The supernumerary *Lbe*-positive neurons in *H99* could possibly be the ones producing the atypical axonal projections.

### Tagma-specific differences in *H99* embryos

In the wt embryo, only eight NB lineages show obvious tagma-specific differences in cell number and composition (Bossing et al., 1996; Schmidt et al., 1997). Tagma-specific differences among serially homologous CNS lineages have previously been shown to be controlled by homeotic genes (e.g. Prokop et al., 1994a; Berger et al., 2005). Therefore, these lineages provide useful models for studying homeotic gene function on segment-specific PCD. In *H99* embryos, we observed further lineages that were differently affected in the thorax and abdomen. How these tagma-specific differences arise in a PCD-deficient background is an interesting question. For example, NB4-3 shows a wild-type cell number in the thorax (8 and 12-13), but has too many cells in the abdomen (15, 15 and 22). There are a couple of plausible scenarios to explain this observation. First, the development of the NB4-3 lineage, including the involvement of PCD, could actually differ in the thorax and abdomen of wt embryos, with the final cell number being similar by chance. The Dil-labeled clones allow determination of the final cell number, but do not reveal how this number is achieved. The difference would

become obvious in an *H99* mutant background, at least regarding the involvement of PCD. Second, and this possibility does not exclude the first one, the thoracic NB4-3 could become a postembryonic NB (pNB) and the abdominal NB4-3 might undergo PCD after generating the embryonic lineage. In *H99*, the abdominal NB would be capable of undergoing a variable number of additional divisions to generate a variable number of progeny. This would easily explain larger discrepancies in cell number between individual clones in *H99* (e.g. the abdominal NB4-3 clone with 22 cells), and is in agreement with our occasional observations of *H99* embryos with a very high CNS cell number per segment, and with the two observed classes of *H99* embryos with high and low numbers of BrdU-positive cells.

NB6-2 is another lineage whose clones differ in the two tagmata of *H99* embryos. In this case, the abdominal clones showed no difference to their wt counterparts, whereas the thoracic clones did (18 and 19 cells). Although no difference in cell number between thoracic and abdominal clones was reported for this lineage, a rather large count range (8-16 cells) was given (Bossing et al., 1996), which would allow for a thorax-specific PCD of two to three postmitotic progeny. Alternatively, the thoracic NB6-2 might undergo cell death upon generating its progeny, which would make it the first identified apoptotic NB in the thorax. When PCD is prevented, this NB may undergo a few additional rounds of division. The data obtained in our experiments do not counter this notion, but the number of clones obtained in the thorax was not sufficient to draw a definite conclusion. As the abdominal NB6-2 lineage in *H99* did not differ from the one in wt, its NB may be one of the few abdominal postembryonic NBs (see below).

### Identities of neuroblasts dying in the late embryo and of surviving neuroblasts resuming proliferation in the larva

As mentioned above, a specific set of NBs undergoes PCD in the late embryo, whereas surviving NBs resume proliferation in the larva as pNBs, after a period of mitotic quiescence (Bray et al., 1989; White et al., 1994; Peterson et al., 2002; Truman and Bate, 1988; Prokop and Technau, 1991; Prokop and Technau, 1994b). The identities of the individual NBs undergoing PCD versus those surviving as pNBs are still unknown. The sizes of NB lineages obtained in *H99* embryos may provide hints for identifying candidate pNBs in the abdomen [12 NBs/hs in A1, four in A2 and three in A3 to A7 according to Truman and Bate (Truman and Bate, 1988)], and NBs that undergo PCD in the thorax at the end of embryogenesis [seven NBs/hs in T1 to T3 (Truman and Bate, 1988)]. In the abdomen, NB1-1a and NB6-2 are obvious candidates for pNBs, as they remained consistently unchanged in *H99* embryos (Table 1). Two other NBs, NB1-2 and NB3-2, are also potential abdominal pNBs as they mostly did not differ from their wt counterparts, and only occasionally contained one additional cell. On the other hand, clones which showed more than twice the cell number in *H99* (NB2-1, NB5-4a and NB7-3, see Table 1) than in wt, strongly suggest that these NBs normally undergo PCD in the abdomen (but perform additional divisions in *H99*), because, even if one daughter cell of each GMC undergoes PCD, they still cannot account for all cells found in *H99* clones.

Regarding thoracic NBs, we can only speculate on account of low sample numbers. NBs which seem to become pNBs in the thorax, as they showed no difference between wt and *H99* clones, are NB3-2 ( $n=2$  clones in *H99*), NB4-3 ( $n=2$ ) and NB4-4 ( $n=3$ ) (Table 1). Potential candidates for NBs which do not become pNBs, but undergo PCD in the thorax, are expected to consistently have a

significant increase in cell number in *H99*. These are NB5-1 ( $n=2$  clones in *H99*) and NB5-5 ( $n=5$ ) (Table 1). In addition, lineages for which we obtained only one clone in *H99* but which also showed many more cells in the thorax than normal are NB2-2t, NB5-4t and NB7-3 (Table 1, and see Fig. S2 in the supplementary material).

### Established models for studying the mechanisms of developmental PCD in the CNS

In order to investigate the developmental signals and mechanisms involved in the regulation of PCD in the embryonic CNS, we identified some of the apoptotic cells which will be used as single-cell PCD models. These are the dHb9-positive RP neuron from NB3-1, Lbe-positive neurons from NB5-3, the Eg-positive GW neuron from NB7-3 and the Eve-positive U neurons from NB7-1. As not much is known about the dying RP motoneuron or the Lbe-positive neurons, our first goal is to characterize each of these cells more closely, based on the combination of expressed molecular markers.

Some of the dying NB7-3 cells are already known to be undifferentiated daughter cells of the second and third GMC, which undergo PCD shortly after birth. Notch has been identified as the signal initiating PCD. The surviving daughters receive the asymmetrically distributed protein Numb, which counteracts the PCD-inducing Notch signal (Lundell et al., 2003). The same had been shown in a sensory organ lineage of the embryonic peripheral nervous system, where cells produced in two subsequent divisions undergo Notch-dependent PCD (Orgogozo et al., 2002). Both the PCD in the NB7-3 lineage and in the sensory organ lineage require the *Hid*, *rpr* and *grim* genes (Novotny et al., 2002; Lundell et al., 2003; Karcavich and Doe, 2005; Orgogozo et al., 2002). It will be interesting to see whether the Notch-Numb interaction also plays a role in the segment-specific PCD of the differentiated GW motoneuron, or if another signal is used for the removal of this, and possibly other, differentiated cells.

The U motoneurons also show a segment-specific cell death pattern (they apoptose in A6 to A8), thus somewhat resembling the MP1 and dMP2 neurons (Miguel-Aliaga and Thor, 2004). However, in contrast to MP1 and dMP2, the U neurons survive in the anterior segments and undergo PCD in the posterior ones. Whether homeotic genes play any role in the survival or death of these cells remains to be investigated.

In summary, we present here descriptions of PCD in the developing CNS of the wt *Drosophila* embryo, and of the CNS of PCD-deficient embryos. We find the pattern of Caspase-dependent PCD to be partly very orderly, suggesting tight spatio-temporal control of cell death, and partly random, which suggests a certain amount of plasticity already in the embryo. The CNS of PCD-deficient embryos is nevertheless well organized, despite the presence of too many cells. We find these superfluous cells to come from both a block in PCD and from additional divisions that surviving NBs go through. We were able to link the occurrence of cell death to identified NB lineages by clonal analysis in PCD-deficient embryos, to uncover segment-specific differences, and to establish single-cell PCD models that will be used in further studies to investigate mechanisms responsible for controlling PCD in the embryonic CNS.

We thank R. Holmgren, J. Skeath, K. Jagla, C. Doe and M. Frasch for reagents; J. Urban and R. Cantera for critical reading of the manuscript; and C. Berger for helpful discussions. This work was supported by a grant from the Deutsche Forschungsgemeinschaft to G.M.T.

### Supplementary material

Supplementary material for this article is available at <http://dev.biologists.org/cgi/content/full/134/1/02707/DC1>

### References

- Abbott, M. K. and Lengyel, J. A. (1991). Embryonic head involution and rotation of male terminalia require the *Drosophila* locus *head involution defective*. *Genetics* **129**, 783-789.
- Abrams, J. M., White, K., Fessler, L. I. and Steller, H. (1993). Programmed cell death during *Drosophila* embryogenesis. *Development* **117**, 29-43.
- Bello, B. C., Hirth, F. and Gould, A. P. (2003). A pulse of the *Drosophila* Hox protein Abdominal-A schedules the end of neural proliferation via neuroblast apoptosis. *Neuron* **37**, 209-219.
- Berger, C., Pallavi, S. K., Prasad, M., Shashidhara, L. S. and Technau, G. M. (2005). A critical role for Cyclin E in cell fate determination in the central nervous system of *Drosophila*. *Nat. Cell Biol.* **7**, 56-62.
- Bossing, T. and Technau, G. M. (1994). The fate of the CNS midline progenitors in *Drosophila* as revealed by a new method for single cell labelling. *Development* **120**, 1895-1906.
- Bossing, T., Udolph, G., Doe, C. Q. and Technau, G. M. (1996). The embryonic central nervous system lineages of *Drosophila melanogaster*. I. Neuroblast lineages derived from the ventral half of the neuroectoderm. *Dev. Biol.* **179**, 41-64.
- Bray, S. J., Burke, B., Brown, N. H. and Hirsh, J. (1989). Embryonic expression pattern of a family of *Drosophila* proteins that interact with a central nervous system regulatory element. *Genes Dev.* **3**, 1130-1145.
- Brennecke, J., Hipfner, D. R., Stark, A., Russell, R. B. and Cohen, S. M. (2003). *bantam* encodes a developmentally regulated microRNA that controls cell proliferation and regulates the proapoptotic gene *hid* in *Drosophila*. *Cell* **113**, 25-36.
- Broihier, H. T. and Skeath, J. B. (2002). *Drosophila* homeodomain protein dHb9 directs neuronal fate via crossrepressive and cell-nonautonomous mechanisms. *Neuron* **35**, 39-50.
- De Graeve, F., Jagla, T., Daponte, J. P., Rickert, C., Dastugue, B., Urban, J. and Jagla, K. (2004). The *ladybird* homeobox genes are essential for the specification of a subpopulation of neural cells. *Dev. Biol.* **270**, 122-134.
- Dittrich, R., Bossing, T., Gould, A. P., Technau, G. M. and Urban, J. (1997). The differentiation of the serotonergic neurons in the *Drosophila* ventral nerve cord depends on the combined function of the zinc finger proteins Eagle and Hucklebein. *Development* **124**, 2515-2525.
- Doe, C. Q., Smouse, D. and Goodman, C. S. (1988). Control of neuronal fate by the *Drosophila* segmentation gene *even-skipped*. *Nature* **333**, 376-378.
- Dong, R. and Jacobs, J. R. (1997). Origin and differentiation of supernumerary midline glia in *Drosophila* embryos deficient for apoptosis. *Dev. Biol.* **190**, 165-177.
- Frasch, M., Hoey, T., Rushlow, C., Doyle, H. and Levine, M. (1987). Characterization and localization of the even-skipped protein of *Drosophila*. *EMBO J.* **6**, 749-759.
- Halter, D. A., Urban, J., Rickert, C., Ner, S. S., Ito, K., Travers, A. A. and Technau, G. M. (1995). The homeobox gene *repo* is required for the differentiation and maintenance of glia function in the embryonic nervous system of *Drosophila melanogaster*. *Development* **121**, 317-332.
- Hidalgo, A., Kinrade, E. F. and Georgiou, M. (2001). The *Drosophila* neuregulin vein maintains glial survival during axon guidance in the CNS. *Dev. Cell* **1**, 679-690.
- Higashijima, S., Shishido, E., Matsuzaki, M. and Saigo, K. (1996). *eagle*, a member of the steroid receptor gene superfamily, is expressed in a subset of neuroblasts and regulates the fate of their putative progeny in the *Drosophila* CNS. *Development* **122**, 527-536.
- Jacobson, M. D., Weil, M. and Raff, M. C. (1997). Programmed cell death in animal development. *Cell* **88**, 347-354.
- Jagla, K., Stanceva, I., Dretzen, G., Bellard, F. and Bellard, M. (1994). A distinct class of homeodomain proteins is encoded by two sequentially expressed *Drosophila* genes from the 93D/E cluster. *Nucleic Acids Res.* **22**, 1202-1207.
- Jagla, K., Frasch, M., Jagla, T., Dretzen, G., Bellard, F. and Bellard, M. (1997). *ladybird*, a new component of the cardiogenic pathway in *Drosophila* required for diversification of heart precursors. *Development* **124**, 3471-3479.
- Jagla, T., Bellard, F., Lutz, Y., Dretzen, G., Bellard, M. and Jagla, K. (1998). *ladybird* determines cell fate decisions during diversification of *Drosophila* somatic muscles. *Development* **125**, 3699-3708.
- Karcavich, R. and Doe, C. Q. (2005). *Drosophila* neuroblast 7-3 cell lineage: a model system for studying programmed cell death, Notch/Numb signaling, and sequential specification of ganglion mother cell identity. *J. Comp. Neurol.* **481**, 240-251.
- Lundell, M. J., Lee, H. K., Perez, E. and Chadwell, L. (2003). The regulation of apoptosis by Numb/Notch signaling in the serotonin lineage of *Drosophila*. *Development* **130**, 4109-4121.
- Miguel-Aliaga, I. and Thor, S. (2004). Segment-specific prevention of pioneer

- neuron apoptosis by cell-autonomous, postmitotic Hox gene activity. *Development* **131**, 6093-6105.
- Novotny, T., Eiselt, R. and Urban, J.** (2002). Hunchback is required for the specification of the early sublineage of neuroblast 7-3 in the *Drosophila* central nervous system. *Development* **129**, 1027-1036.
- Oppenheim, R. W.** (1991). Cell death during development of the nervous system. *Annu. Rev. Neurosci.* **14**, 453-501.
- Orgogozo, V., Schweisguth, F. and Bellaiche, Y.** (2002). Binary cell death decision regulated by unequal partitioning of Numb at mitosis. *Development* **129**, 4677-4684.
- Peterson, C., Carney, G. E., Taylor, B. J. and White, K.** (2002). *reaper* is required for neuroblast apoptosis during *Drosophila* development. *Development* **129**, 1467-1476.
- Prokop, A. and Technau, G. M.** (1991). The origin of postembryonic neuroblasts in the ventral nerve cord of *Drosophila melanogaster*. *Development* **111**, 79-88.
- Prokop, A. and Technau, G. M.** (1994a). Early tagma-specific commitment of *Drosophila* CNS progenitor NB1-1. *Development* **120**, 2567-2578.
- Prokop, A. and Technau, G. M.** (1994b). Normal function of the *mushroom body defect* gene of *Drosophila* is required for the regulation of the number and proliferation of neuroblasts. *Dev. Biol.* **161**, 321-337.
- Rusconi, J. C., Hays, R. and Cagan, R. L.** (2000). Programmed cell death and patterning in *Drosophila*. *Cell Death Differ.* **7**, 1063-1070.
- Schmid, A., Chiba, A. and Doe, C. Q.** (1999). Clonal analysis of *Drosophila* embryonic neuroblasts: neural cell types, axon projections and muscle targets. *Development* **126**, 4653-4689.
- Schmidt, H., Rickert, C., Bossing, T., Vef, O., Urban, J. and Technau, G. M.** (1997). The embryonic central nervous system lineages of *Drosophila melanogaster*. II. Neuroblast lineages derived from the dorsal part of the neuroectoderm. *Dev. Biol.* **189**, 186-204.
- Sonnenfeld, M. J. and Jacobs, J. R.** (1995). Macrophages and glia participate in the removal of apoptotic neurons from the *Drosophila* embryonic nervous system. *J. Comp. Neurol.* **359**, 644-652.
- Truman, J. W. and Bate, M.** (1988). Spatial and temporal patterns of neurogenesis in the central nervous system of *Drosophila melanogaster*. *Dev. Biol.* **125**, 145-157.
- Truman, J. W., Thorn, R. S. and Robinow, S.** (1992). Programmed neuronal death in insect development. *J. Neurobiol.* **23**, 1295-1311.
- Udolph, G., Prokop, A., Bossing, T. and Technau, G. M.** (1993). A common precursor for glia and neurons in the embryonic CNS of *Drosophila* gives rise to segment-specific lineage variants. *Development* **118**, 765-775.
- White, K., Grether, M. E., Abrams, J. M., Young, L., Farrell, K. and Steller, H.** (1994). Genetic control of programmed cell death in *Drosophila*. *Science* **264**, 677-683.
- Zhou, L., Hashimi, H., Schwartz, L. M. and Nambu, J. R.** (1995). Programmed cell death in the *Drosophila* central nervous system midline. *Curr. Biol.* **5**, 784-790.
